# Supplementary material
Source: PubMed Central journal article supplement (PMC4628587)
Supplement: NIHMS728987-supplement-supplement_1.pdf [file NIHMS728987-supplement-supplement_1.pdf]

## **Supplementary Appendix**

Supplement to Schoen RE, et al. Incidence and Mortality to Colorectal Cancer in Individuals with a Family History of Colorectal Cancer

### **Contents**

|                                                                                                         |        |
|---------------------------------------------------------------------------------------------------------|--------|
| Supplemental Table 1 (S1):<br>Relationship Between Family History of CRC and Mortality to CRC by Gender | Page 2 |
| Supplemental Table 2 (S2):<br>Relationship Between FH of CRC and Incident CRC by Anatomic Subsite       | Page 3 |

Table S1. Relationship Between Family History of CRC and Mortality to CRC by Gender

|                                   | # of CRC deaths | Person-years | Rate (per 10,000 PY) | MV <sup>1</sup> adjusted Hazard Ratio (95% CI) | p-value |
|-----------------------------------|-----------------|--------------|----------------------|------------------------------------------------|---------|
| <b>Men (N = 307 CRC deaths)</b>   |                 |              |                      |                                                |         |
| Family History of CRC             |                 |              |                      |                                                |         |
| No                                | 273             | 715319       | 3.82                 | 1.00 (ref)                                     | 0.30    |
| Yes                               | 34              | 73609        | 4.62                 | 1.20 (0.8-1.7)                                 |         |
| <b>Women (N = 231 CRC deaths)</b> |                 |              |                      |                                                |         |
| Family History of CRC             |                 |              |                      |                                                |         |
| No                                | 194             | 743194       | 2.61                 | 1.00 (ref)                                     | 0.04    |
| Yes                               | 37              | 95741        | 3.86                 | 1.44 (1.01-2.0)                                |         |

1. Multivariate adjustment including trial arm, age, FOBT, prior lower GI endoscopy, NSAID use and BMI

Table S2. Relationship Between FH of CRC and Incident CRC by Anatomic Subsite

| Family History                              | No. Cases (n) | Person-years | Rate (per 10,000 PY) | MV <sup>1</sup> adjusted Hazard Ratio (95% CI) | p-value |
|---------------------------------------------|---------------|--------------|----------------------|------------------------------------------------|---------|
| Rectal Cancer (N=462)                       |               |              |                      |                                                |         |
| No                                          | 406           | 1423420      | 2.9                  | 1.00 (ref)                                     | 0.10    |
| Yes                                         | 56            | 165057       | 3.4                  | 1.27 (0.95-1.69)                               |         |
| Colon Cancer (N=1628)                       |               |              |                      |                                                |         |
| No                                          | 1411          | 1423420      | 9.9                  | 1.00 (ref)                                     | 0.0003  |
| Yes                                         | 217           | 165057       | 13.1                 | 1.31 (1.14-1.50)                               |         |
| Distal Colon Cancer <sup>2</sup> (N=996)    |               |              |                      |                                                |         |
| No                                          | 865           | 1423420      | 6.1                  | 1.00 (ref)                                     | 0.001   |
| Yes                                         | 131           | 165057       | 7.9                  | 1.36 (1.13-1.64)                               |         |
| Proximal Colon Cancer <sup>3</sup> (N=1085) |               |              |                      |                                                |         |
| No                                          | 945           | 1423420      | 6.6                  | 1.00 (ref)                                     | 0.02    |
| Yes                                         | 140           | 165057       | 8.5                  | 1.24 (1.03-1.48)                               |         |

1. Multivariate adjustment including trial arm, age, FOBT, prior lower GI endoscopy, NSAID use and BMI
2. Distal colon cancer is defined as lesions identified in the rectum through descending colon
3. Proximal colon cancer is defined as lesions identified in the splenic flexure to the cecum
